# Supplementary material for: A human stem cell-derived test system for agents modifying neuronal N-methyl-d-aspartate-type glutamate receptor Ca2+-signalling
Source: Arch Toxicol. 2021 Mar 13;95(5):1703–22. doi: 10.1007/s00204-021-03024-0 (PMC8113295; doi:10.1007/s00204-021-03024-0)
Supplement: Supplementary file 1 — Supplementary file1 (PDF 1823 KB) [file 204_2021_3024_MOESM1_ESM.pdf]

# **A human stem cell-derived test system for agents modifying neuronal N-methyl-D-aspartate-type glutamate receptor $\text{Ca}^{2+}$ -signalling**

*Stefanie Klima<sup>1,2</sup>, Markus Brüll<sup>1</sup>, Anna-Sophie Spreng<sup>1,3</sup>, Ilinca Suciu<sup>1,3</sup>, Tjalda Falt<sup>1</sup>, Jens C Schwamborn<sup>4</sup>, Tanja Waldmann<sup>1</sup>, Christiaan Karreman<sup>1</sup>, Marcel Leist<sup>1,5</sup>*

| <b>Table of Contents</b> |     |                                                                                   |
|--------------------------|-----|-----------------------------------------------------------------------------------|
| Tab. S1                  | P2  | Overview of compounds used in this study                                          |
| Tab. S2                  | P2  | Primary antibodies used in this study                                             |
| Tab. S3                  | P3  | Primers used in this study                                                        |
| Tab. S4                  | P3  | Numeric values of log <sub>2</sub> fold change transcriptome data                 |
| Fig. S1                  | P6  | Characterization of NESC                                                          |
| Fig. S2                  | P8  | Characterization of MCCs at different developmental stages                        |
| Fig. S3                  | P10 | Comparison between transcriptome analysis of ESC-derived and iPSC-derived MCCs    |
| Fig. S4                  | P12 | Determination of reactivity threshold                                             |
| Fig. S5                  | P13 | Specificity controls of $\text{Ca}^{2+}$ signaling in MCCs and peripheral neurons |
| Fig. S6                  | P14 | $\text{Ca}^{2+}$ traces of MCCs to characterize their NMDA receptor               |

**Supplementary table 1: Overview of compounds used in this study**

| Compound               | Solvent | Concentration [ $\mu$ M] | Supplier     | Catalogue number |
|------------------------|---------|--------------------------|--------------|------------------|
| AP5                    | water   | 50                       | Sigma        | A8054            |
| bicuculline            | DMSO    | 1                        | Sigma        | B-9130           |
| dextromethorphan (DXM) | water   | 50                       | Sigma        | D2531            |
| domoic acid            | water   | 1                        | Sigma        | D6152            |
| glutamate              | water   | 0.5-20                   | Sigma        | G1626            |
| ibotenic acid          | water   | 50                       | Tocris       | 0285             |
| kainate                | water   | 10                       | Tocris       | 0222             |
| KCl                    | water   | 10000, 30000             | Sigma        | P9541            |
| ketamine               | water   | 50                       | Sigma        | K2753            |
| MgCl <sub>2</sub>      | water   | 5000                     | Merck        | 105833           |
| MK801                  | DMSO    | 6                        | Sigma        | M107             |
| nicotine               | DMSO    | 50                       | Sigma        | 36733            |
| NMDA                   | water   | 0.5-50                   | Tocris       | 0114             |
| Pb(II)ac               | water   | 50                       | Sigma        | 316512           |
| phencyclidine (PCP)    | water   | 50                       | Tocris       | 2557             |
| quinolinic acid        | DMSO    | 500                      | Sigma        | P63204           |
| S-AMPA                 | water   | 10                       | Tocris       | 0254             |
| traxoprodil            | DMSO    | 5                        | Sigma        | SML0053          |
| veratridine            | DMSO    | 100                      | alomone labs | V-110            |
| Zn <sup>2+</sup>       | water   | 100                      | Sigma        | Z0152            |

**Supplementary table 2: Primary antibodies used in this study**

| Target        | Isotype     | Dilution | Supplier                     | Catalogue number | Lot number |
|---------------|-------------|----------|------------------------------|------------------|------------|
| TUBB3         | mouse IgG2a | 1:1000   | Covance                      | MMS-435P         | D13AF00117 |
| Nestin        | mouse IgG1  | 1:100    | R&D                          | MAB1259          | HSG0213091 |
| Ki67 (PE)     | mouse IgG1  | 1:600    | BD Pharmingen                | 556027           | 03428      |
| DCX           | goat        | 1:100    | Santa Cruz                   | sc-8067          | L1008      |
| PAX6          | rabbit      | 1:200    | Covance                      | PRB-278-P        | D14BF00330 |
| PAX3          | mouse IgG2a | 1:200    | Ch. O. Ordahl, San Francisco |                  |            |
| SOX1          | goat        | 1:200    | R&D Systems                  | AF3369           | XUV0213111 |
| MAP2          | mouse IgG1  | 1:1000   | Sigma                        | M4403            | 063M4802   |
| NeuN          | mouse IgG1  | 1:200    | Merck Millipore              | MAB377           | 2159655    |
| Gad65/67      | rabbit      | 1:200    | Bioworld                     | BS1400           | 360803     |
| Synaptophysin | mouse IgG1  | 1:200    | Synaptic Systems             | 101011           | 1-51       |
| S100 $\beta$  | mouse IgG1  | 1:500    | Sigma                        | S2532            | 023M4828   |
| vGlut1        | rabbit      | 1:500    | Synaptic-Systems             | AB5905           | LV1439669  |

**Supplementary table 3: Primers antibodies used in this study**

| Target       | Sequence (For)              | Sequence (Rev)             |
|--------------|-----------------------------|----------------------------|
| CDK1         | AGAGCTTTGGGCACTCCCAA        | TGCCAGAAATTCGTTTGGCTG      |
| CDK2         | GAATCTCCAGGGAATAGGCC        | TACACCCATGAGGTGGTGAC       |
| CYCLIN D1    | CTCACACGCTTCCTCTCCA         | CACCTCCTCCTCCTCCTCTT       |
| CYCLIN D2    | ATGTTCTTGGCCTCCAAAC         | GCCAGGTTCCACTTCAACTT       |
| DCX          | GCGAAATTTTTTCAGGACCAC       | CACAGAAGCCATCAAACCTGG      |
| GAPDH        | ATGGAGAAGGCTGGGGCTCA        | AGTGATGGCATGGACTGTGGTCAT   |
| GFAP         | CGAGATCGCCACCTACAGGAAGC     | CCTTAATGACCTCTCCATCCCGC    |
| HES5         | TTGGAGTTGGGCTGGTG           | CCCAAAGAGAAAAACCGA         |
| MAP2         | CGGATGACCTAAAGCGATTTC       | TCTGGAGCATTGTCATTTGC       |
| NANOG        | GGTGAAGACCTGGTTCCAGAAC      | CATCCCTGGTGGTAGGAAGAGTAAAG |
| NESTIN       | GCACCTCAAGATGTCCCTCAGC      | GGGAAGTTGGGCTCAGGACTG      |
| NEUN         | AGCCCGGGAGAAGCTGAATG        | GTGCCGGTGGTGGGGTAGGG       |
| NR1          | GTCCACCAGACTGAAGATTGTGAC    | CTCCTCCTTGCATGTCCCA        |
| NR2A         | GCTCTTCTCCATCAGCAGGG        | GGATCCCGTCAGATTGAAGTCT     |
| NR2B         | GGTCTTCTCCATCAGCAGAGG       | TGTTGTTTCATGGTTGCGGT       |
| OCT4         | GCAAAGCAGAAACCCTCGTGC       | ACACTCGGACCACATCCTTCTCG    |
| PAX3         | GACTGGCTCCATACGTCCTGGTGC    | CGGCTGATGGAACCTACTGACGG    |
| PAX6         | CCGCCTATGCCAGCTTCAC         | AAGTGGTGCCCGAGGTGCC        |
| PSD95        | CACTCCTCACAGTGCTGCAT        | TGTCTTCATCTTGGTAGCGG       |
| RPL13A       | GGTATGCTGCCCCACAAAACC       | CTGTCACTGCCTGGTACTTCCA     |
| S100 $\beta$ | CTTAGAGGAAATCAAAGAGCAGGAGGT | CATGTTCAAAGAACTCGTGGCAGG   |
| SLC17A6      | GCGGCCTGGGCTTCTGCATC        | AGCCGAGACGCGATGTAGCC       |
| SOX1         | CCGGGATAAGGGCCTCCCCA        | ACACAGGGGAGCACAGGGGC       |
| SYNAPSIN     | TCAGACCTTCTACCCCAATCA       | GTCCTGGAAGTCATGCTGGT       |
| TBP          | GGGCACCACTCCACTGTATC        | GCAGCAAACCGCTTGGGATTATATCG |
| TUBB3        | AACTACGTGGGCGACTCGGA        | GTTGTTGCCGGCCCCACTCT       |

**Supplementary table 4: Numeric values of log<sub>2</sub> fold change transcriptome data**

Neuroepithelial stem cells (NESCs) from two pluripotent stem cell lines (H9 and Sigma iPSC) were differentiated into mixed cortical cultures (MCCs), and mRNA was prepared for transcriptome analysis. From a set of about 3500 genes the expression of selected neuronal, non-neuronal and stem cell markers for two cell lines is shown in a heatmap in Fig 2B. The data are given on a log<sub>2</sub> fold change scale with MCC relative to NESC. Here the log<sub>2</sub> fold changes (log<sub>2</sub>FC), adjusted p-values (padj) and the standard errors of log<sub>2</sub>FC (lfcSE) are given for all genes included in the heatmap.

| Gene name | logFC |       | padj      |          | lfcSE |      |
|-----------|-------|-------|-----------|----------|-------|------|
|           | Sigma | H9    | Sigma     | H9       | Sigma | H9   |
| DCX       | 3.83  | 3.34  | 2.17E-78  | 4.74E-19 | 0.20  | 0.36 |
| TUBB3     | 0.40  | 0.33  | 1.20E-01  | 5.74E-01 | 0.23  | 0.45 |
| MAP2      | 2.63  | 2.53  | 7.49E-59  | 1.00E-36 | 0.16  | 0.19 |
| NEFL      | 0.97  | 3.12  | 7.46E-05  | 1.21E-15 | 0.23  | 0.37 |
| NEFH      | -2.10 | 0.31  | 3.44E-16  | 7.40E-01 | 0.25  | 0.70 |
| APP       | 2.62  | 2.17  | 2.77E-21  | 1.13E-06 | 0.27  | 0.42 |
| MAPT      | 6.01  | 5.85  | 3.62E-196 | 1.40E-45 | 0.20  | 0.40 |
| RBFOX3    | 2.58  | 5.56  | 1.86E-06  | 2.05E-11 | 0.52  | 0.79 |
| SNCA      | 1.05  | 2.92  | 1.45E-04  | 3.86E-20 | 0.26  | 0.31 |
| ENO2      | 3.68  | 3.15  | 2.88E-96  | 3.36E-27 | 0.17  | 0.28 |
| PRNP      | 0.77  | 1.65  | 1.20E-04  | 2.19E-04 | 0.19  | 0.41 |
| DLG4      | 2.58  | 2.44  | 5.66E-85  | 3.76E-30 | 0.13  | 0.21 |
| HOMER1    | 0.80  | 0.68  | 1.13E-03  | 9.99E-02 | 0.23  | 0.35 |
| HOMER2    | -0.92 | 0.78  | 6.14E-03  | 4.64E-02 | 0.32  | 0.34 |
| SNAP25    | 2.98  | 3.31  | 1.46E-29  | 9.25E-16 | 0.26  | 0.39 |
| SYN1      | 3.24  | 4.81  | 3.58E-34  | 7.37E-34 | 0.26  | 0.39 |
| SYP       | 0.50  | 4.49  | 1.98E-01  | 1.62E-12 | 0.34  | 0.61 |
| GRIA2     | 7.88  | 6.05  | 6.33E-103 | 8.94E-46 | 0.36  | 0.41 |
| GRIA3     | 3.89  | 5.17  | 2.49E-28  | 3.56E-16 | 0.35  | 0.61 |
| GRIK4     | 4.37  | 4.60  | 3.07E-35  | 1.79E-13 | 0.35  | 0.60 |
| GRIK5     | 5.57  | 4.94  | 5.11E-23  | 3.81E-18 | 0.55  | 0.55 |
| GRIN2A    | 0.90  | 4.82  | 2.31E-01  | 1.85E-04 | 0.66  | 1.18 |
| GRIN2C    | -1.07 | -1.40 | 4.81E-02  | 7.21E-02 | 0.50  | 0.66 |
| GRIN2D    | 4.28  | 6.15  | 3.21E-15  | 4.75E-09 | 0.53  | 0.99 |
| GRM4      | 4.97  | 6.09  | 9.56E-10  | 2.04E-08 | 0.79  | 1.02 |
| GRIN1     | 6.60  | 7.92  | 1.65E-20  | 7.32E-14 | 0.70  | 1.01 |
| GRIN2B    | 3.30  | 9.68  | 2.51E-24  | 2.56E-23 | 0.32  | 0.94 |
| GLUL      | -2.14 | -0.43 | 3.72E-19  | 2.19E-01 | 0.23  | 0.29 |
| SLC17A6   | 7.67  | 8.05  | 2.32E-126 | 1.57E-58 | 0.32  | 0.49 |
| SLC17A7   | 0.26  | 1.98  | NA        | NA       | 3.06  | 1.96 |
| GABRA2    | 7.88  | 7.63  | 5.16E-22  | 1.53E-11 | 0.80  | 1.08 |
| GABRB3    | 3.38  | 2.92  | 2.22E-21  | 3.23E-26 | 0.35  | 0.27 |
| GABBR1    | 1.45  | 1.78  | 1.88E-09  | 8.96E-07 | 0.23  | 0.34 |
| GAD1      | 0.64  | 4.88  | 4.14E-02  | 2.44E-13 | 0.29  | 0.64 |
| GAD2      | 4.63  | 7.22  | 6.11E-24  | 1.29E-10 | 0.45  | 1.07 |
| NES       | -3.89 | -1.85 | 5.20E-29  | 4.04E-06 | 0.34  | 0.37 |
| VIM       | -0.14 | -0.50 | 4.34E-01  | NA       | 0.15  | 0.43 |
| AQP4      | 2.94  | 2.33  | 8.02E-08  | 2.52E-01 | 0.53  | 1.65 |
| GFAP      | 10.53 | -0.41 | 4.72E-39  | NA       | 0.79  | 2.02 |
| SLC1A2    | 0.84  | 1.76  | 2.51E-02  | 3.09E-07 | 0.35  | 0.32 |
| SLC1A3    | 2.70  | 2.31  | 2.74E-19  | 2.55E-05 | 0.29  | 0.51 |
| S100B     | 1.72  | 6.30  | 7.04E-07  | 3.84E-24 | 0.34  | 0.60 |
| MAOB      | 3.23  | 3.20  | 4.57E-22  | 3.76E-04 | 0.33  | 0.82 |
| MBP       | -1.18 | 0.50  | 6.90E-01  | NA       | 2.37  | 3.17 |
| OLIG2     | -4.56 | 3.09  | 2.33E-21  | 6.73E-02 | 0.47  | 1.45 |

|         |       |       |          |          |      |      |
|---------|-------|-------|----------|----------|------|------|
| CYP3A4  | -1.93 | -0.82 | 5.69E-01 | NA       | 2.79 | 3.19 |
| CYP1A2  | -1.18 | -0.24 | NA       | NA       | 3.06 | 3.19 |
| GSTA1   | -1.43 | -1.90 | 1.44E-01 | 2.94E-01 | 0.88 | 1.47 |
| GSTA2   | -1.54 | -1.14 | 6.54E-01 | NA       | 2.77 | 2.31 |
| CYP2E1  | 3.08  | 2.10  | 2.61E-08 | 8.54E-04 | 0.54 | 0.57 |
| CYP2C8  | 1.88  | 1.20  | 9.89E-02 | 4.19E-01 | 1.03 | 1.17 |
| SULT2A1 | NA    | -0.24 | NA       | NA       | NA   | 3.19 |
| SLCO1B1 | -0.46 | -1.18 | NA       | NA       | 3.06 | 3.19 |
| SOX17   | -0.82 | 0.48  | 7.89E-01 | NA       | 2.48 | 3.18 |
| FOXD3   | -0.49 | 1.97  | 2.09E-01 | NA       | 0.35 | 1.94 |
| MSX1    | -1.28 | -1.86 | 4.82E-05 | 9.24E-03 | 0.30 | 0.63 |
| NGFR    | -0.01 | 0.92  | 9.65E-01 | 9.08E-02 | 0.22 | 0.46 |
| PAX3    | -2.25 | -2.63 | 9.18E-15 | 1.47E-06 | 0.28 | 0.51 |
| ROBO1   | 3.35  | 2.07  | 3.63E-30 | 5.22E-08 | 0.29 | 0.36 |
| SOX10   | -6.92 | -0.65 | 2.54E-59 | 7.91E-01 | 0.42 | 1.81 |
| SOX9    | 2.35  | 2.60  | 4.40E-13 | 5.48E-12 | 0.32 | 0.36 |
| TWIST1  | 1.22  | -0.46 | 5.90E-03 | NA       | 0.42 | 2.75 |
| SNAI2   | 3.05  | 2.22  | 4.02E-12 | 2.28E-03 | 0.43 | 0.66 |
| HTR1B   | 0.63  | 2.16  | 8.39E-01 | 2.36E-01 | 2.48 | 1.49 |
| HTR6    | 0.58  | 0.12  | 7.85E-01 | NA       | 1.73 | 3.19 |
| HTR5A   | 1.96  | 3.84  | 4.85E-02 | 1.01E-02 | 0.91 | 1.32 |
| ADRB2   | -0.25 | -0.65 | 8.49E-01 | 5.41E-01 | 1.05 | 0.82 |
| DRD2    | -0.31 | 3.03  | 2.61E-01 | 5.13E-11 | 0.24 | 0.44 |
| KCNJ6   | 1.26  | -0.41 | 6.69E-02 | 5.60E-01 | 0.63 | 0.54 |
| NR4A2   | 5.31  | 3.39  | 2.59E-11 | 1.21E-06 | 0.77 | 0.65 |
| SLC6A3  | -0.48 | -1.26 | 8.01E-01 | 5.15E-01 | 1.54 | 1.50 |
| SLC18A2 | 1.48  | 1.47  | 3.64E-03 | 6.55E-02 | 0.48 | 0.68 |
| TH      | 4.61  | 2.12  | 7.89E-14 | 1.87E-02 | 0.60 | 0.79 |
| COMT    | -1.51 | 0.47  | 7.91E-04 | 7.64E-01 | 0.43 | 1.16 |
| CHRNA2  | 1.26  | 1.21  | 4.92E-01 | 6.67E-01 | 1.53 | 2.12 |
| CHRNA4  | 2.00  | 2.51  | 2.71E-14 | 1.11E-05 | 0.26 | 0.53 |
| CHRNA2  | 1.30  | 2.59  | 2.78E-06 | 6.71E-08 | 0.27 | 0.45 |
| ACHE    | 4.54  | 6.92  | 1.30E-65 | 6.24E-45 | 0.26 | 0.48 |
| CHAT    | 0.29  | 3.60  | 9.11E-01 | 2.81E-02 | 2.02 | 1.43 |
| P2RY13  | -1.54 | NA    | NA       | NA       | 3.06 | NA   |
| P2RY14  | NA    | 0.40  | NA       | NA       | NA   | 2.64 |
| P2RX3   | 3.19  | 1.90  | 1.33E-26 | 3.92E-07 | 0.29 | 0.35 |
| CDH1    | 1.99  | 0.77  | 5.95E-02 | 7.32E-01 | 0.97 | 1.67 |
| FUT4    | -0.05 | 0.24  | 9.62E-01 | 8.41E-01 | 0.77 | 0.89 |
| NANOG   | -0.12 | 1.19  | 8.54E-01 | 2.74E-01 | 0.53 | 0.88 |
| POU5F1  | -2.54 | 0.12  | 8.23E-24 | NA       | 0.25 | 3.19 |
| SOX2    | -0.81 | -0.86 | 1.32E-05 | 1.67E-02 | 0.18 | 0.32 |

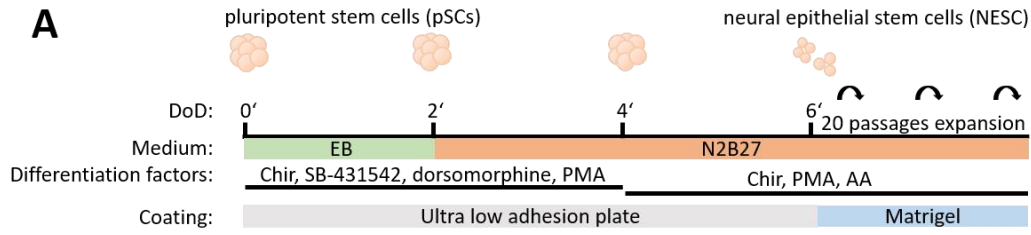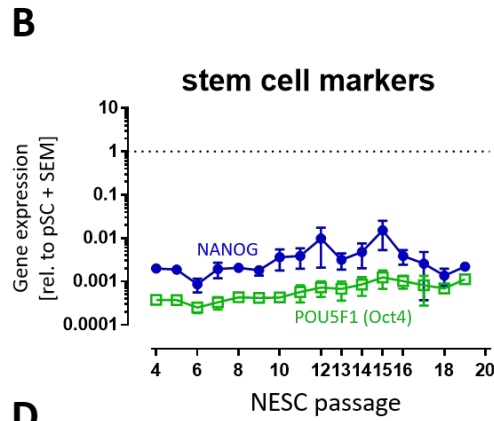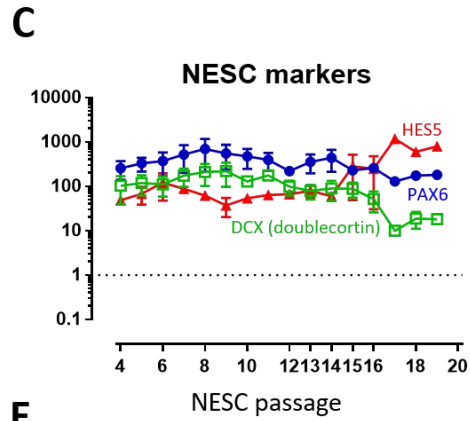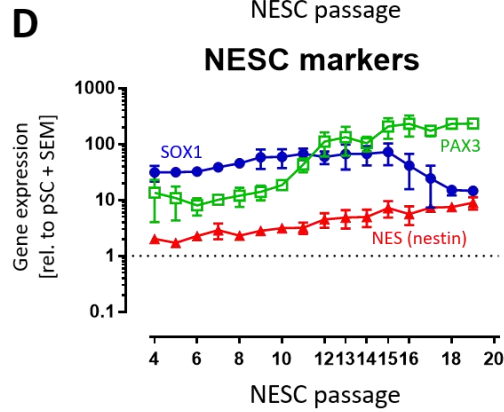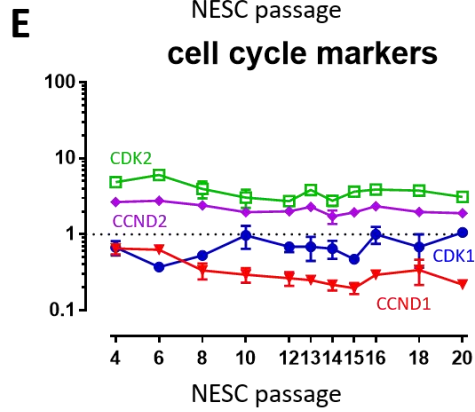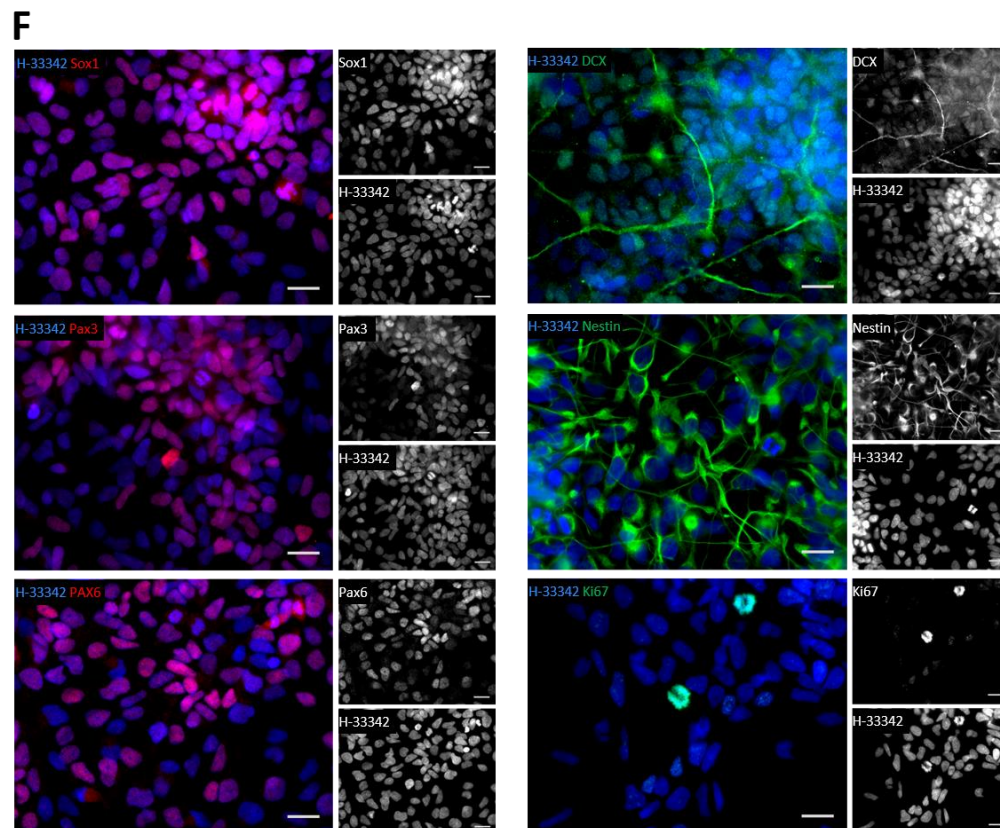

### Supplementary figure 1: Characterisation of NESC

Neuroepithelial stem cells (NESC) were generated from pluripotent stem cells (pSCs) according to Reinhardt *et al.* ([Reinhardt et al. 2013](#)) by differentiating for 6 days in 3D spheres, followed by an expansion and maintenance phase of up to 20 passages. (A) Schematic display of NESC differentiation and expansion (Chir – Chir99021, PMA – purmorphamine, AA – ascorbic acid). (B) Gene expression profiles of the stem cell markers NANOG, POU5F1. Gene expression was quantified by real-time PCR. Data are shown relative to pSCs. (C and D) Gene expression of NESC markers PAX6, DCX, HES5, SOX1, PAX3, NES. Gene expression of the cell cycle markers cyclin dependent kinase CDK1, CDK2, CCND1, and CCND2. All data are means  $\pm$  SEM of 2-3 biological replicates and cover NESC passage 4 until NESC passage 20. (F) Immunofluorescence images of NESC at passage 13 using antibodies against the neural progenitor markers Sox1, Pax3, Pax6, doublecortin (DCX), nestin, and the proliferation marker Ki67 (green). Nuclei were counterstained with Hoechst H-33342. Scale bars: 50  $\mu$ m.

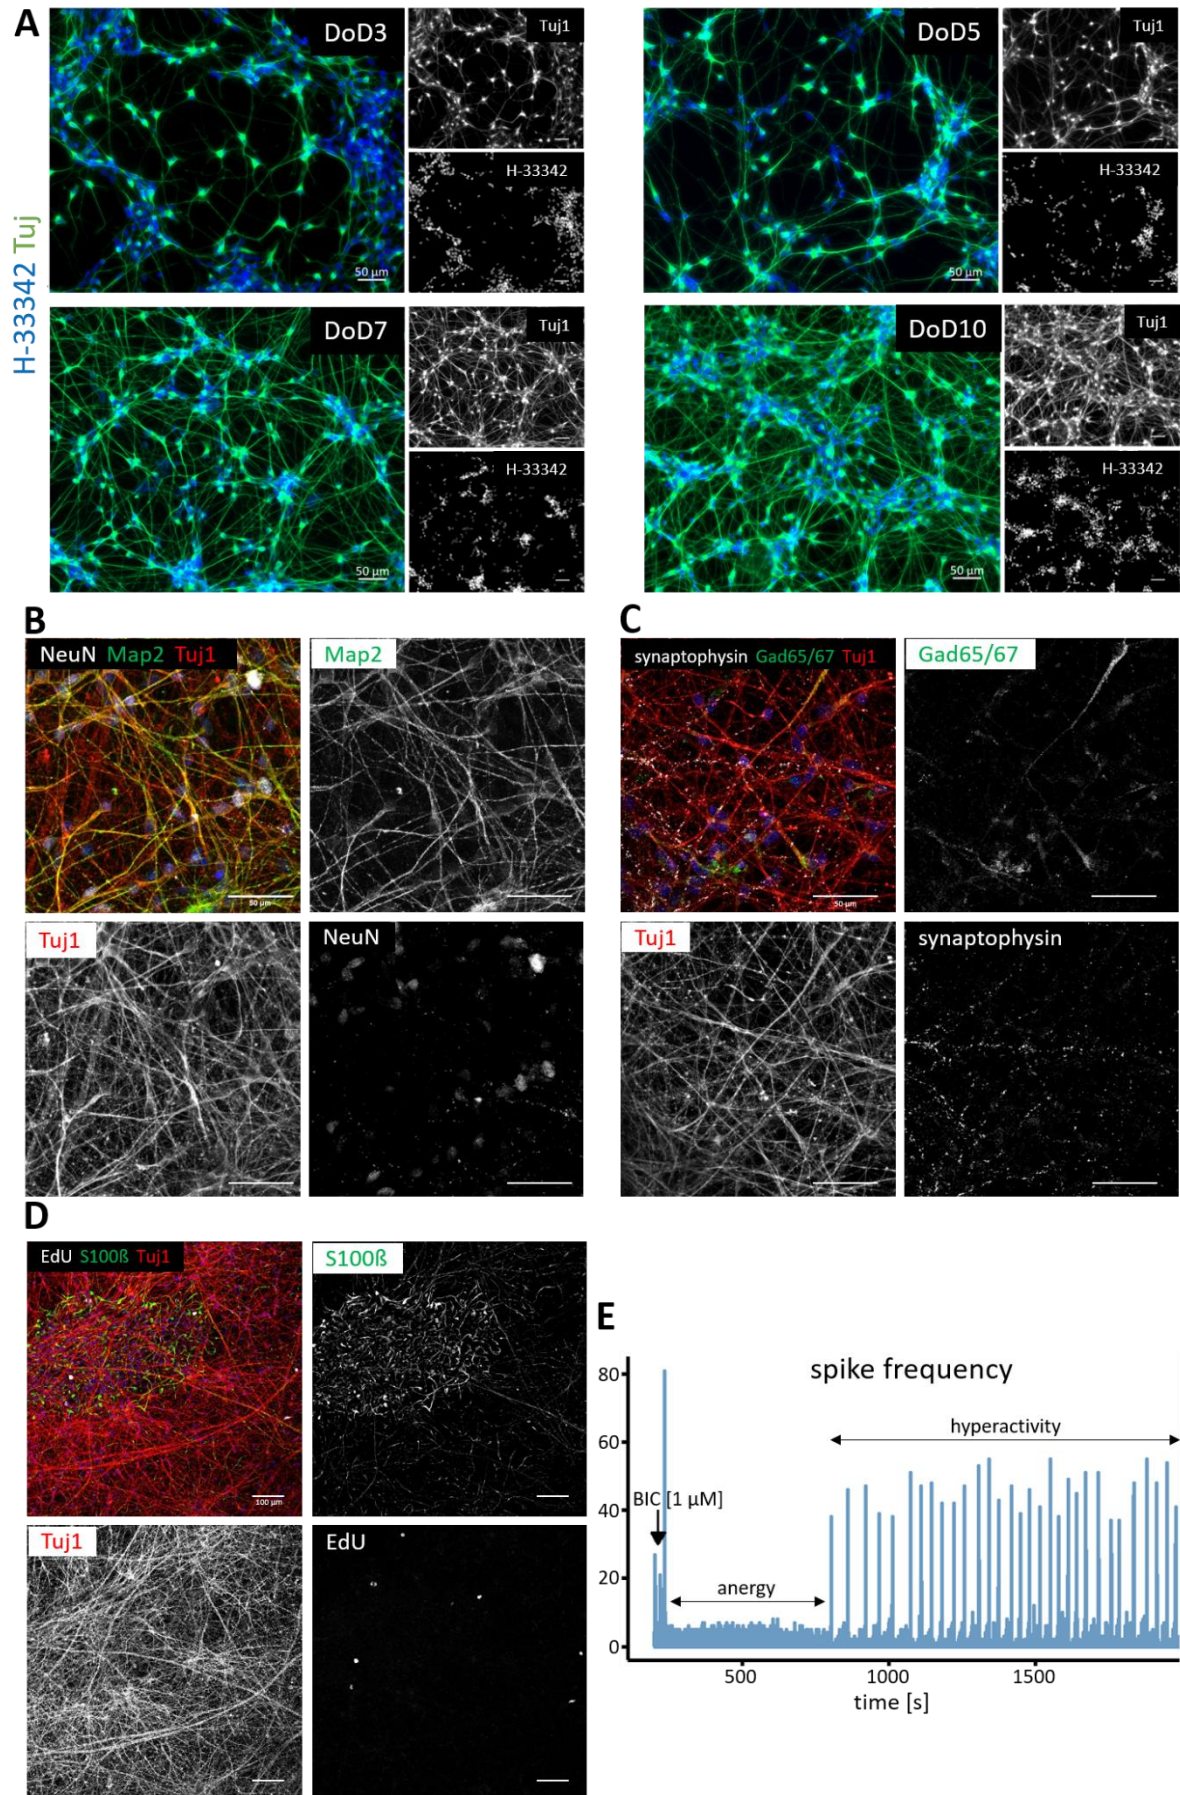

### ***Supplementary figure 2: Characterization of MCCs at different developmental stages***

MCCs were differentiated on glass coverslips for 3, 5, 7, 10, or 24 days and fixed for immunostaining on the respective day. (A) Time course of neuronal network formation: cells stained on DoD3, DoD5, DoD7, and DoD10 with an antibody against the neuron specific cytoskeletal marker beta-III-tubulin (Tuj1). (B) Neurons were differentiated for 24 days and stained with markers of mature neurons like NeuN, Map2, and the neuronal marker Tuj1. (C) Immunostaining of the presynaptic marker synaptophysin, Gad65/67, the enzyme catalyzing the decarboxylation of glutamate to  $\gamma$ -aminobutyric acid (GABA), and the neuronal marker Tuj1 on DoD24. (D) Replicating cells on DoD24 were visualized by the nucleotide analog 5-ethynyl-2'-deoxyuridine (EdU), cells were counterstained against the glial cell marker S100 $\beta$ , and the neuronal marker Tuj1. Scale bars: 50  $\mu$ m. (E) MCCs were differentiated on MEA plates. Spontaneous spikes of electrical activity were recorded. On DoD24 MCCs on MEAs were treated with the GABA<sub>A</sub> receptor antagonist bicuculline [1  $\mu$ M] (addition is indicated by a black arrow). The generation of spikes was recorded directly before and after administration, the number of spikes was binned (bin size 0.1 s) and a representative example of the response is shown.

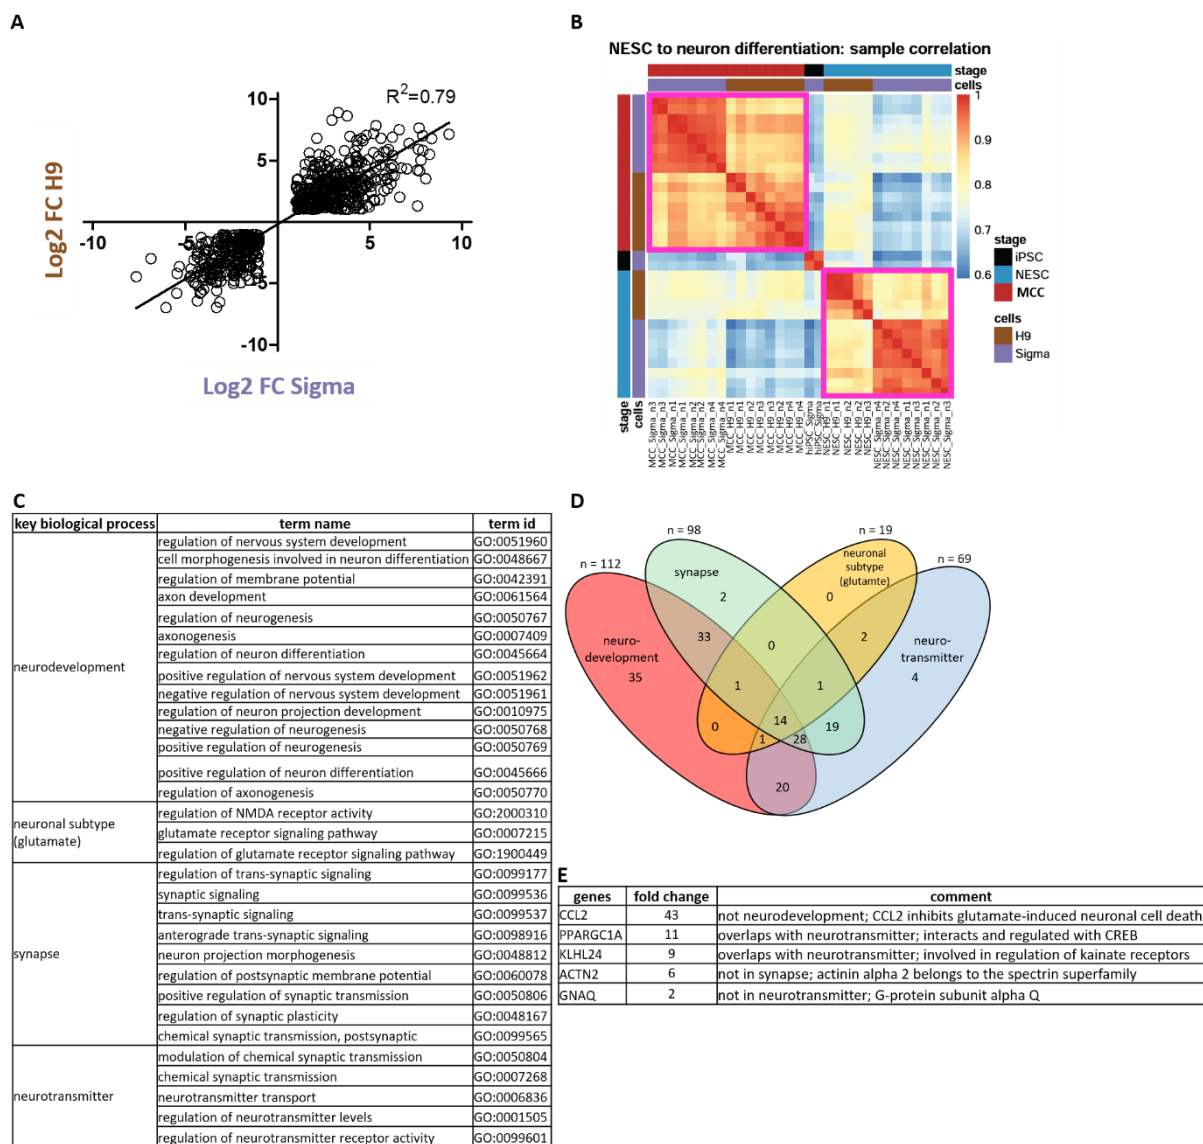

### Supplementary figure 3: Comparison between transcriptome analysis of ESC-derived and iPSC-derived MCCs

Neuroepithelial stem cells (NESCs) from two pluripotent stem cell lines (H9 and Sigma iPSC) were differentiated into mixed cortical cultures (MCCs), and mRNA was prepared for transcriptome analysis. A set of about 3500 genes was used for targeted RNAseq analysis (TempOSeq method), and expression levels were obtained for four cell preparations (some with two samples per cell preparation). For both cell types differentially expressed genes (DEGs) between NESC and MCC were identified, for further analysis only DEGs present in both H9-derived and iPSC-derived cells were used. (A) Log2FC of DEGs from H9-derived and iPSC-derived cells were plotted against each other and the  $R^2$  of the correlation was determined. (B) A correlogram describing the distance of samples and thereby showing their similarity was prepared. Samples were allowed to cluster in an unsupervised way. (C) All upregulated DEGs with an adjusted p-value  $<0.05$  and  $\log_2FC >1$  were analyzed for over-represented gene ontology (GO) terms (Raudvere et al. 2019). GO terms with a size between 4 and 1000 genes were included in further analysis. The first (lowest p-value) 50 GOs of the category biological process were further assigned to the four key biological processes “neurodevelopment”, “synapse”, “neurotransmitter”, and “neuronal subtype (glutamate)”. In the table all GOs

included in a key biological process are listed with their term name and their corresponding term id. (D) As one gene can be present in different GOs, multiple entries of the same gene in one key biological process are possible. Genes with multientries were counted only once per key biological process. The genes included in the four key biological processes were compared and overlays were performed. (E) The table shows the five genes from the key biological process “neuronal subtype (glutamate)” which are only included in this term and not in one of the other three biological processes, the fold change and a short comment on the respective gene is given.

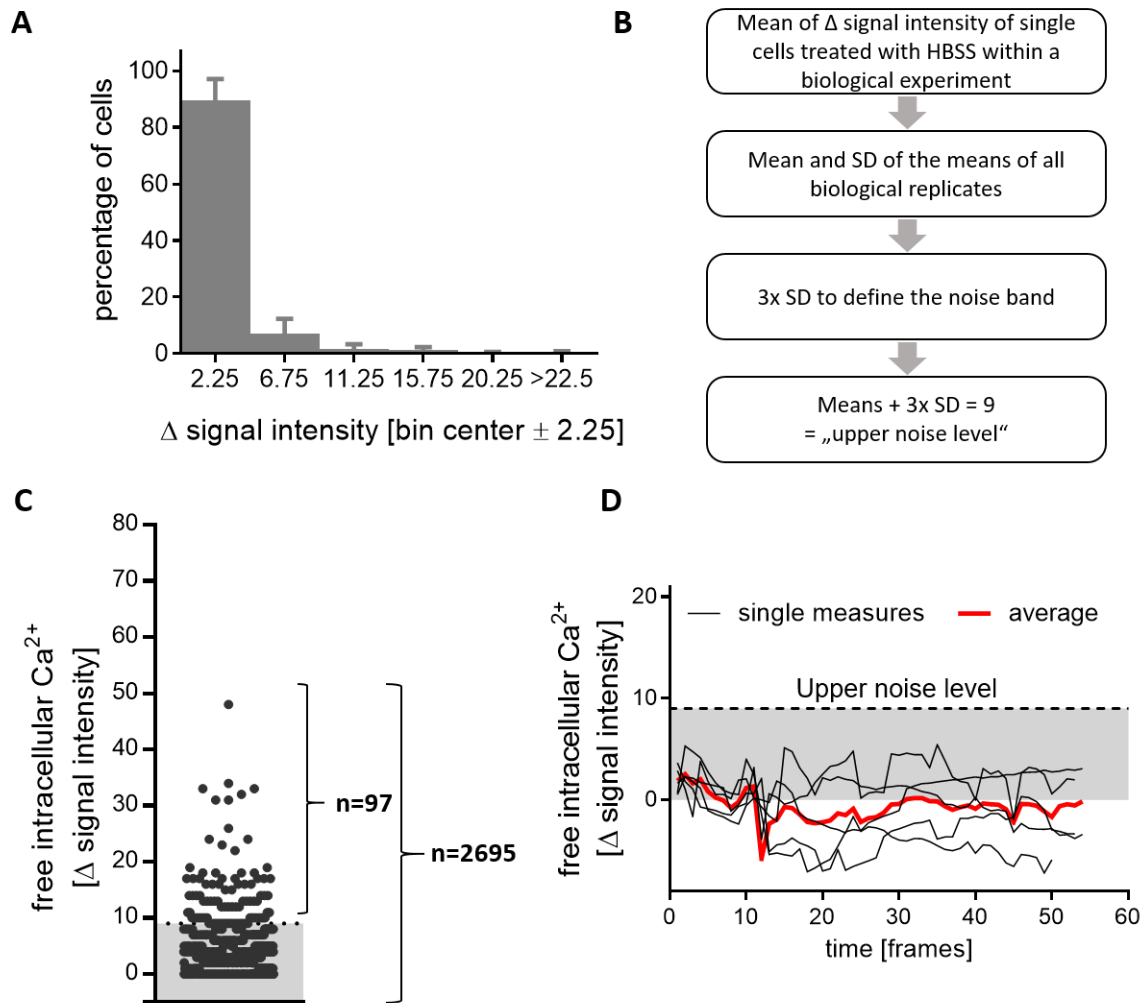

#### Supplementary figure 4: Determination of reactivity threshold

MCCs were differentiated for 24 days and subsequently used for  $\text{Ca}^{2+}$  imaging. Stimulation with the negative control Hank's balanced salt solution (HBSS) was performed to determine the background noise and the threshold of reactivity. (A) Changes of  $\text{Ca}^{2+}$  indicator fluorescence (=delta signal intensity values) of cells treated with HBSS were binned (bin size 4.5), and data are shown as percentage of total cells analyzed. Data are means  $\pm$  SD; n=6 (B) Workflow to determine the noise band of HBSS and of the threshold of  $\Delta$  signal intensity to discriminate negative and positive responses. (C) Delta signal intensity of each individual cell treated with HBSS on DoD24. The grey area under the dotted line represents the noise band. All values above the threshold of 9 are counted as reactive cells. Measurements for 2695 individual cells from six biological replicates are shown. False positive were 3.6%. (D)  $\text{Ca}^{2+}$  signaling traces of five different measurements are shown in black, the red trace represents the average of all single measurements. The grey area under the dotted line represents the noise band.

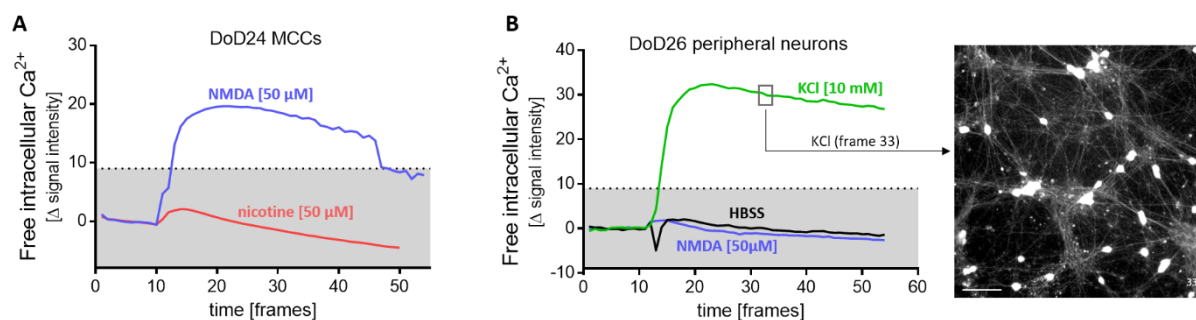

**Supplementary figure 5: Specificity controls of  $\text{Ca}^{2+}$  signaling in MCCs and peripheral neurons**

(A) MCCs were differentiated for 24 days and subsequently used for  $\text{Ca}^{2+}$  imaging. To test for specificity, NMDA [50  $\mu\text{M}$ ] or nicotine [50  $\mu\text{M}$ ] were administered and free intracellular  $\text{Ca}^{2+}$  was measured. Traces of the mean  $\Delta$  signal intensity from >20 cells are shown. (B) Peripheral neurons were differentiated for 26 days according to Hoelting *et al.* (Hoelting *et al.* 2016) and also used for  $\text{Ca}^{2+}$  imaging. Changes in free intracellular  $\text{Ca}^{2+}$  were measured after the administration of KCl [10 mM], NMDA [50  $\mu\text{M}$ ] and HBSS. An image of cells after the treatment with KCl [10 mM] illustrates the neuronal phenotype the cells have on DoD26. Data are averages from >50 cells.

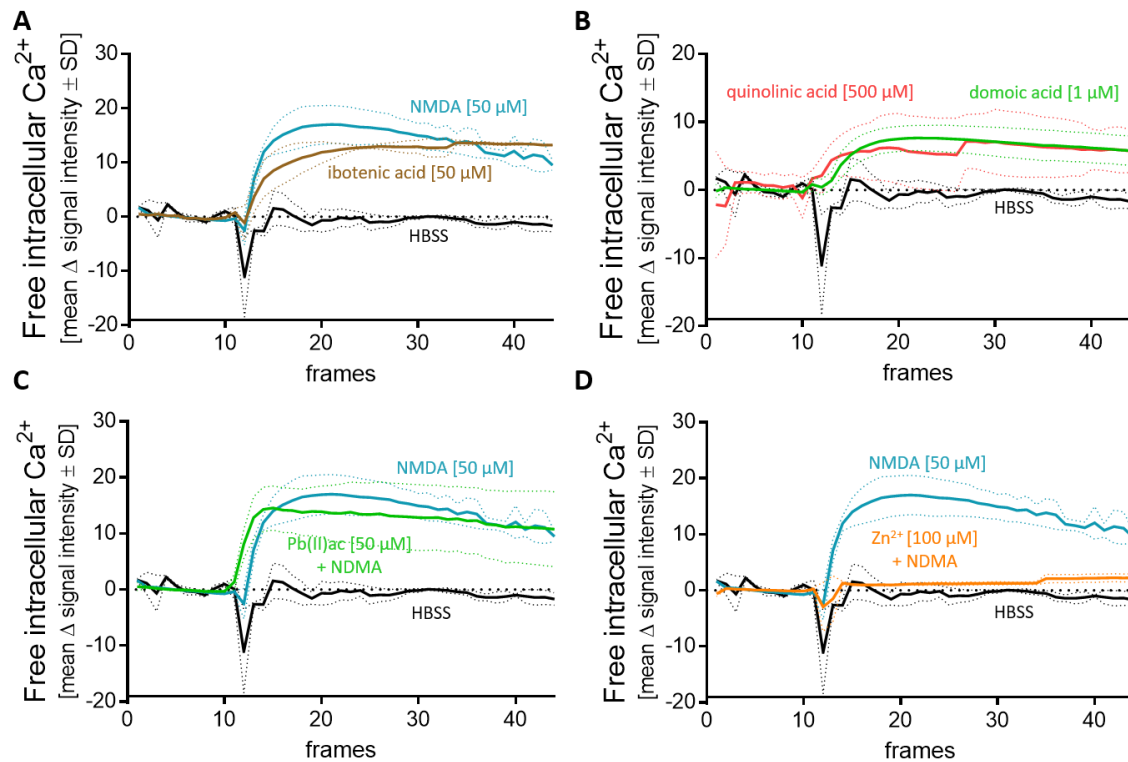

**Supplementary figure 6:  $\text{Ca}^{2+}$  traces of MCCs to characterize their NMDA receptor**

MCCs were differentiated until DoD24 and subsequently  $\text{Ca}^{2+}$  imaging was performed. Changes in free intracellular  $\text{Ca}^{2+}$  were measured after the administration of the different NMDA receptor agonist: (A) NMDA [50  $\mu\text{M}$ ], ibotenic acid [50  $\mu\text{M}$ ], (B) quinolinic acid [500  $\mu\text{M}$ ], and domoic acid [1  $\mu\text{M}$ ]. Cells were pre-incubated for 30 minutes with (C)  $\text{Pb(II)ac}$  [50  $\mu\text{M}$ ] and (D) with  $\text{Zn}^{2+}$  [100  $\mu\text{M}$ ] a known NMDA receptor antagonist and subsequently stimulated with NMDA [50  $\mu\text{M}$ ]. Data are averages from 2-4 biological replicates, the dotted lines represent the SD.

## Supplementary References

- Hoelting L, Klima S, Karreman C, et al. (2016) Stem Cell-Derived Immature Human Dorsal Root Ganglia Neurons to Identify Peripheral Neurotoxicants. *Stem cells translational medicine* 5(4):476-87 doi:10.5966/sctm.2015-0108
- Raudvere U, Kolberg L, Kuzmin I, et al. (2019) g:Profiler: a web server for functional enrichment analysis and conversions of gene lists (2019 update). *Nucleic Acids Res* 47(W1):W191-w198 doi:10.1093/nar/gkz369
- Reinhardt P, Glatza M, Hemmer K, et al. (2013) Derivation and expansion using only small molecules of human neural progenitors for neurodegenerative disease modeling. *PLoS One* 8(3):e59252 doi:10.1371/journal.pone.0059252
